# Supplementary material
Source: MDPI journal article supplement (https://www.mdpi.com/2312-7481/9/8/192)
Supplement: s1 [file s1]

---

## SUPPLEMENTARY MATERIAL

---

# <sup>13</sup>C chemical shifts in saccharides in the solid state: a density functional theory study

Hadeel Moustafa, Flemming H. Larsen, Anders Ø. Madsen,  
Stephan P. A. Sauer

**TABLE S1** Calculated chemical shifts for monosaccharides, using a reference value of 168.1 ppm.

| name/site (ppm)       | C <sub>1</sub> | C <sub>2</sub> | C <sub>3</sub> | C <sub>4</sub> | C <sub>5</sub> | C <sub>6</sub> |
|-----------------------|----------------|----------------|----------------|----------------|----------------|----------------|
| Fructose              | 104.91         | 67.69          | 68.43          | 72.17          | 65.67          | 64.56          |
| α-Glucose             | 96.38          | 69.41          | 71.63          | 72.9           | 71.52          | 63.54          |
| α-Glucose monohydrate | 96.37          | 69.99          | 72.19          | 69.66          | 72.12          | 59.88          |
| β-Glucose             | 98.93          | 76.39          | 74.54          | 70.25          | 74.55          | 61.39          |
| α-galactose           | 95.42          | 70.64          | 70.05          | 70.97          | 69.05          | 57.47          |
| β-galactose           | 102.02         | 69.99          | 74.68          | 68.59          | 74.37          | 60.17          |

**TABLE S2** Calculated chemical shifts for monosaccharides using a reference value of 156 ppm.

| name/site (ppm)         | C <sub>1</sub> | C <sub>2</sub> | C <sub>3</sub> | C <sub>4</sub> | C <sub>5</sub> | C <sub>6</sub> |
|-------------------------|----------------|----------------|----------------|----------------|----------------|----------------|
| Fructose                | 92.81          | 55.59          | 56.33          | 60.07          | 53.57          | 52.46          |
| α-D-Glucose             | 84.28          | 57.31          | 59.53          | 60.80          | 59.42          | 51.44          |
| α-D-Glucose monohydrate | 85.84.27       | 57.89          | 60.09          | 57.56          | 60.02          | 47.78          |
| β-D-Glucose             | 86.83          | 64.29          | 62.44          | 58.15          | 62.45          | 49.29          |
| α-D-galactose           | 83.32          | 58.54          | 57.95          | 58.87          | 56.95          | 45.37          |
| β-D-galactose           | 89.92          | 57.89          | 62.58          | 56.49          | 62.27          | 48.07          |

**TABLE S3** Calculated chemical shifts for monosaccharides, using the linear regression technique.

| name/site (ppm)       | C <sub>1</sub> | C <sub>2</sub> | C <sub>3</sub> | C <sub>4</sub> | C <sub>5</sub> | C <sub>6</sub> |
|-----------------------|----------------|----------------|----------------|----------------|----------------|----------------|
| Fructose              | 100.77         | 67.84          | 68.49          | 71.80          | 66.05          | 65.07          |
| α-Glucose             | 93.22          | 69.36          | 71.32          | 72.45          | 71.23          | 64.17          |
| α-Glucose monohydrate | 93.21          | 69.87          | 71.82          | 69.58          | 71.76          | 60.93          |
| β-Glucose             | 95.48          | 75.53          | 73.90          | 70.10          | 73.91          | 62.26          |
| α-galactose           | 92.37          | 70.45          | 69.93          | 70.74          | 69.04          | 58.79          |
| β-galactose           | 98.21          | 69.87          | 74.02          | 68.63          | 73.75          | 61.18          |
